# Supplementary material for: Organ-specific transcriptome profiling of metabolic and pigment biosynthesis pathways in the floral ornamental progenitor species Anthurium amnicola Dressler
Source: PubMed Central journal article supplement (PMC5431427; doi:10.1038/s41598-017-00808-2), 2017-05-04
Supplement: 41598_2017_808_MOESM2_ESM.pdf [file 41598_2017_808_MOESM2_ESM.pdf]

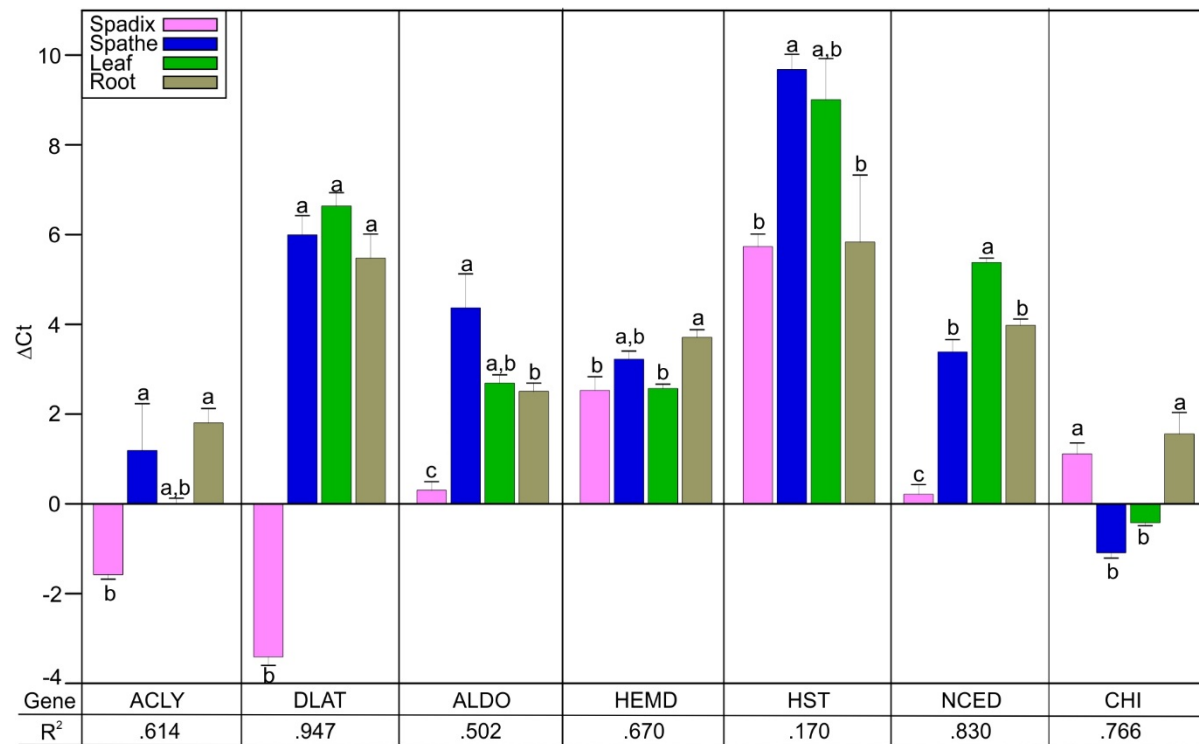

**Supplementary Figure S1 –qPCR validation of select target genes.** qPCR  $\Delta$ Ct values for seven *A. amnicola* metabolic pathway unigenes corresponding to genes *ACLY*, *DLAT*, *ALDO*, *HEMD*, *HST*, *NCED*, *CHI* (Supplementary Table S6) based on the mean of three samples each of four tissue types, spadix (pink), spathe (blue), leaf (green) and root (brown) are shown.  $\Delta$ Ct values were calculated using two reference genes *ACT* and *IF3B*. RNA-seq data correlation, represented by R<sup>2</sup> was calculated by comparing qPCR  $\Delta$ Ct and RNA-Seq TMM normalized FPKM values for each gene across all 12 (three samples for each of the four tissue types) samples. Error bars denote standard error; different letter designations denote significant  $\Delta$ Ct value differences.
